# Supplementary material for: A novel co-drug of aspirin and ursolic acid interrupts adhesion, invasion and migration of cancer cells to vascular endothelium via regulating EMT and EGFR-mediated signaling pathways: multiple targets for cancer metastasis prevention and treatment
Source: PubMed Central journal article supplement (PMC5341967; doi:10.18632/oncotarget.12232), 2016-09-24
Supplement: oncotarget-07-73114-s001.pdf [file oncotarget-07-73114-s001.pdf]

# A novel co-drug of aspirin and ursolic acid interrupts adhesion, invasion and migration of cancer cells to vascular endothelium via regulating EMT and EGFR-mediated signaling pathways: multiple targets for cancer metastasis prevention and treatment

## Supplementary Materials

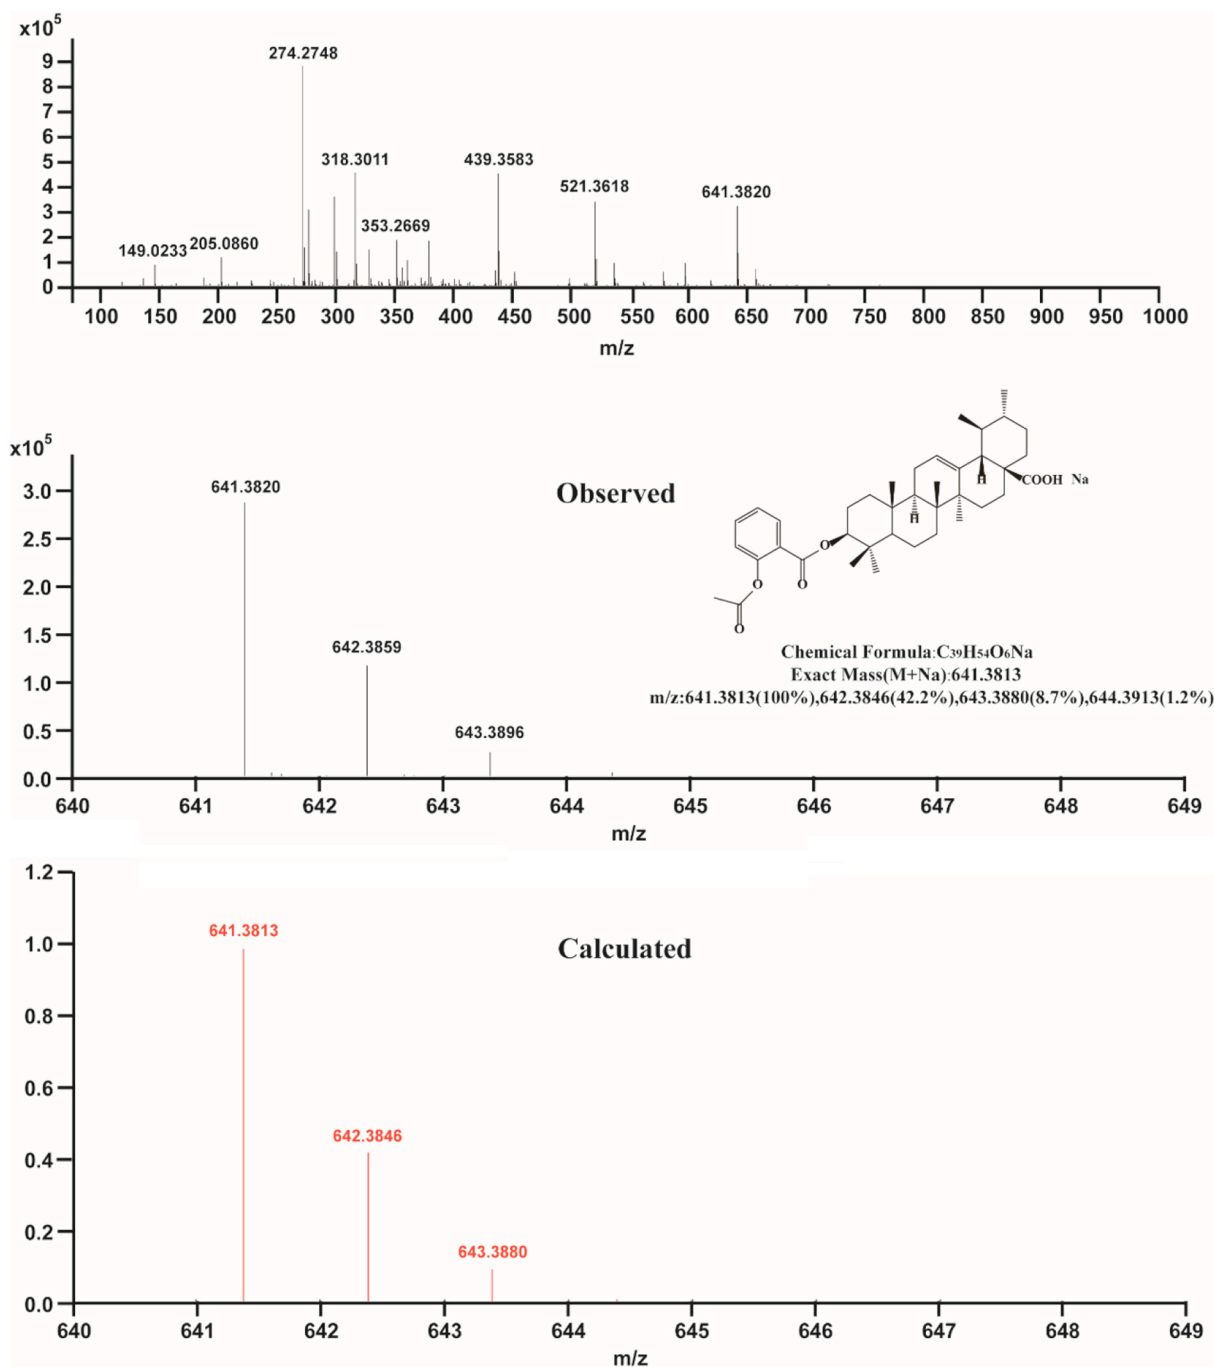

Supplementary Figure S1: ESI-HRMS spectra of Asp-UA.

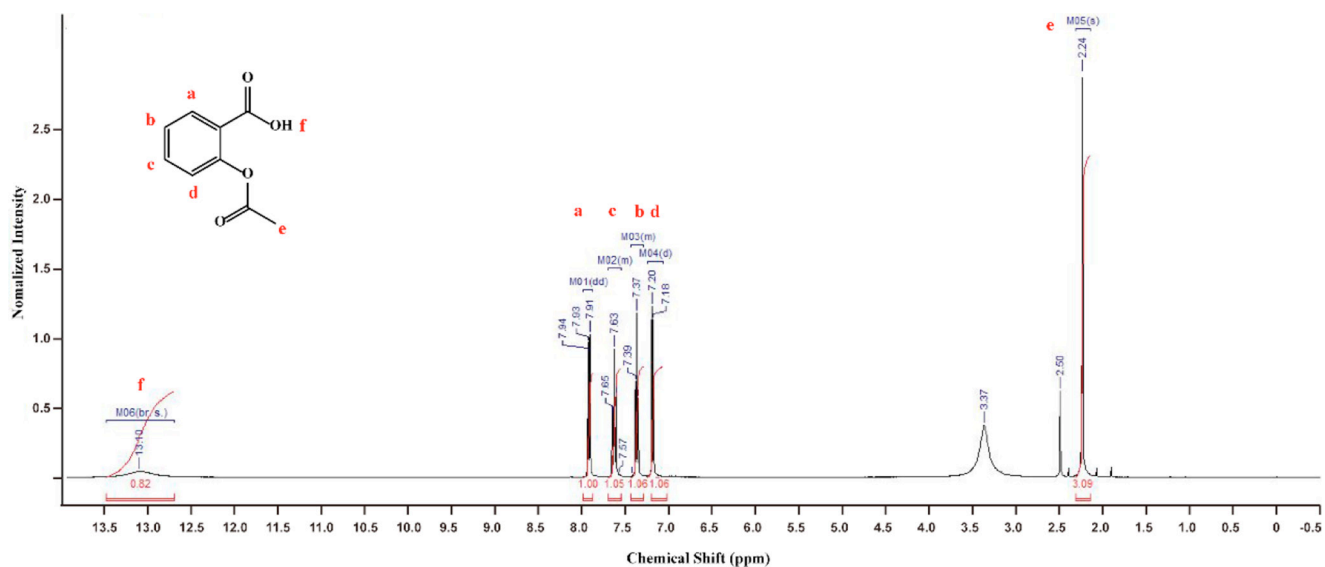

Supplementary Figure S2: NMR spectra of Asp with indicated peaks (400 MHz, DMSO-d<sub>6</sub>, δ, ppm).

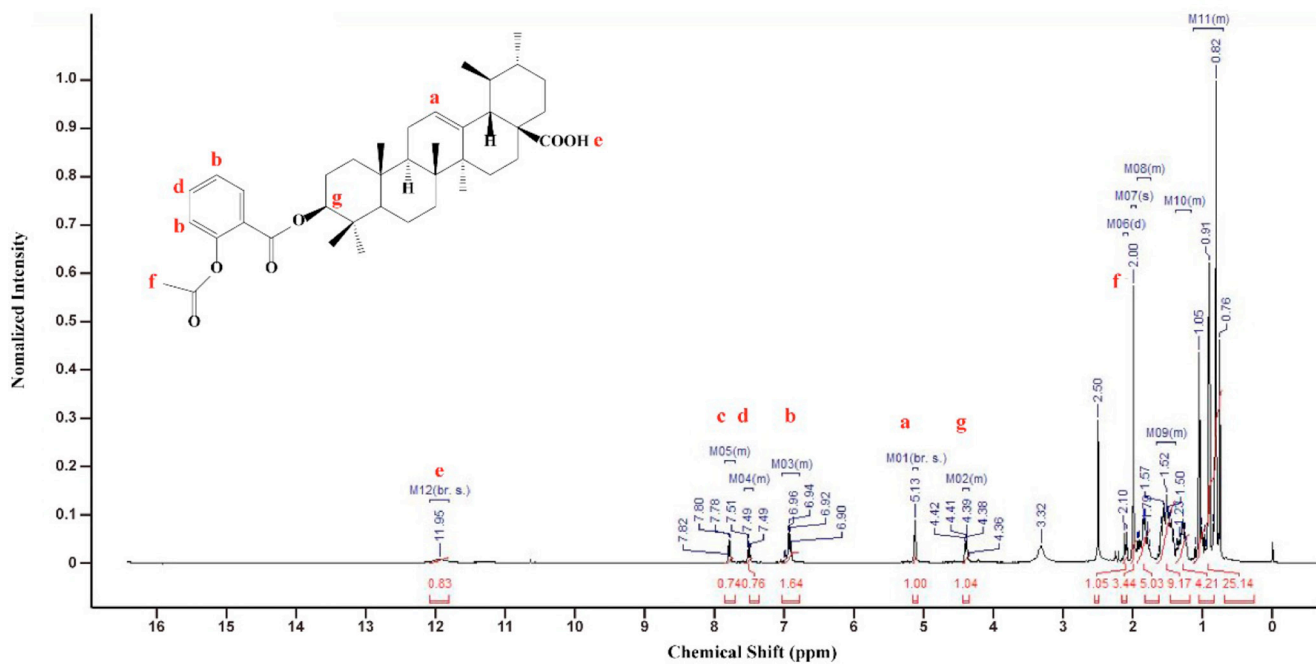

Supplementary Figure S3: NMR spectra of Asp-UA with indicated peaks (400 MHz, DMSO-d<sub>6</sub>, δ, ppm).

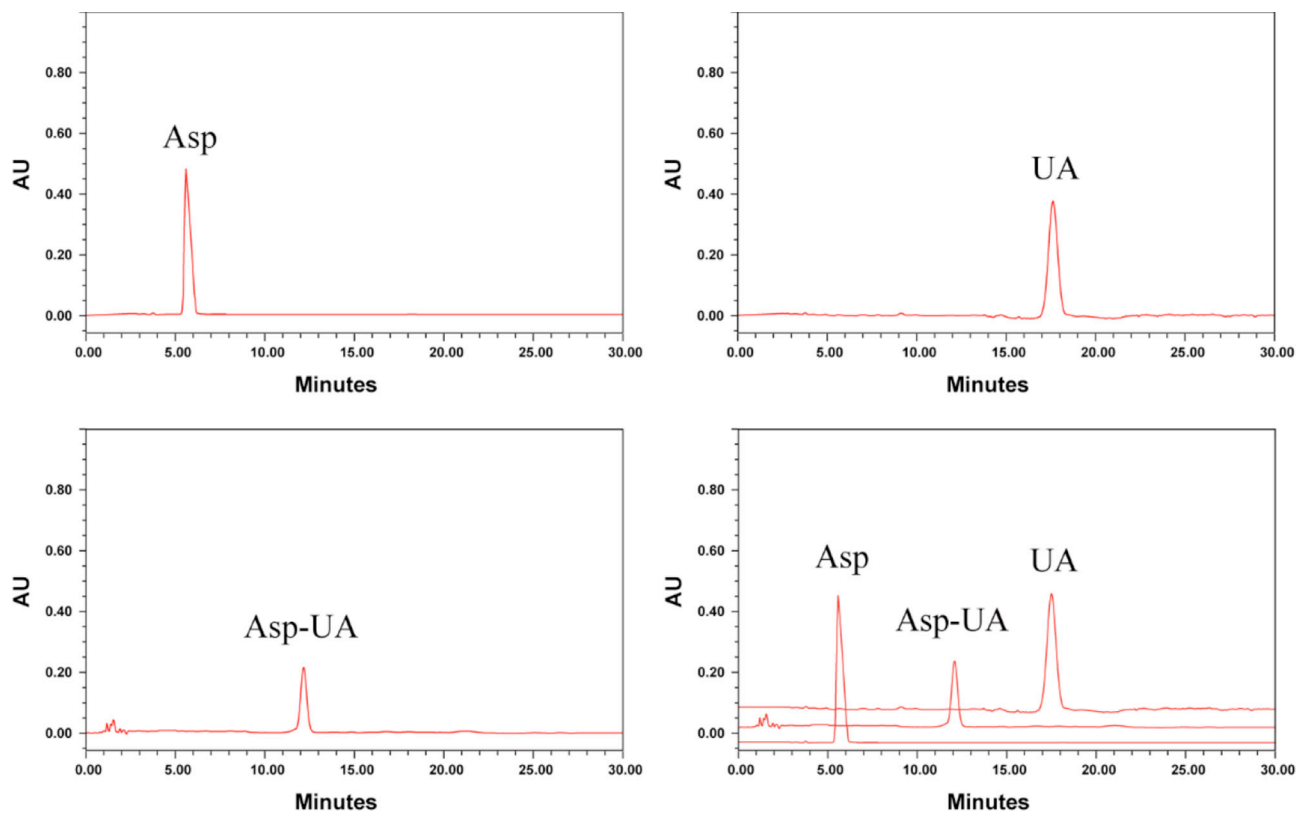

**Supplementary Figure S4: HPLC analysis on the reaction products of Asp-UA.** Pure standard aspirin and ursolic acid were used for comparison. Wavelength used: 280 nm.

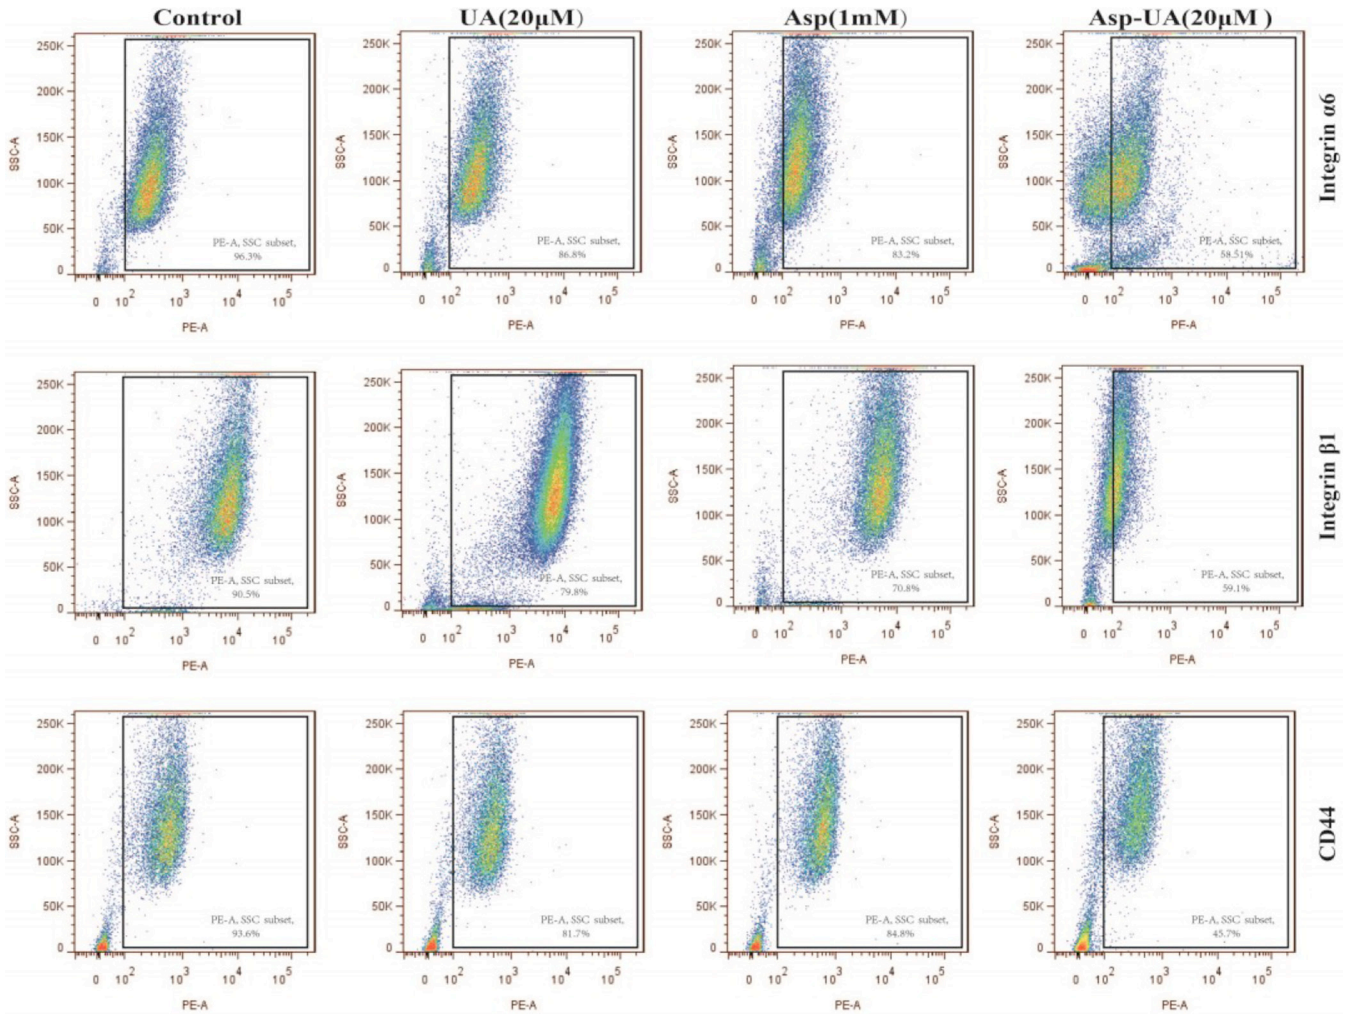

**Supplementary Figure S5: FACS analysis on the expression of integrin  $\alpha6$ ,  $\beta1$  and CD44 by UA/Asp/Asp-UA treatment with results in dot plot format.**
